# Supplementary material
Source: MDPI journal article supplement (https://www.mdpi.com/1996-1073/14/4/1077)
Supplement: s1 [file s1]

# Controlled Salinity-biosurfactant Enhanced Oil Recovery at Ambient and Reservoir Temperatures - an Experimental Study

Tinuola Udoh <sup>1</sup> and Jan Vinogradov <sup>2,\*</sup>

<sup>1</sup> Department of Chemical/Petrochemical Engineering, Akwa Ibom State University, 520001 Ikot Akpaden, Nigeria; tinuolaudoh@aksu.edu.ng

<sup>2</sup> School of Engineering, University of Aberdeen, Aberdeen, AB24 3UE, UK;

\* Correspondence: jan.vinogradov@abdn.ac.uk

## XRD analysis

The x-ray diffraction (XRD) analysis was carried out in the X-ray Laboratory at the Chemistry department of the University of Aberdeen. The measurements were obtained on powdered clean rock sample that was crushed and the result is showed below. The peaks of the plot were used to identify the composition of the rock sample as 95% calcite, 4% dolomite and 1% anhydrite.

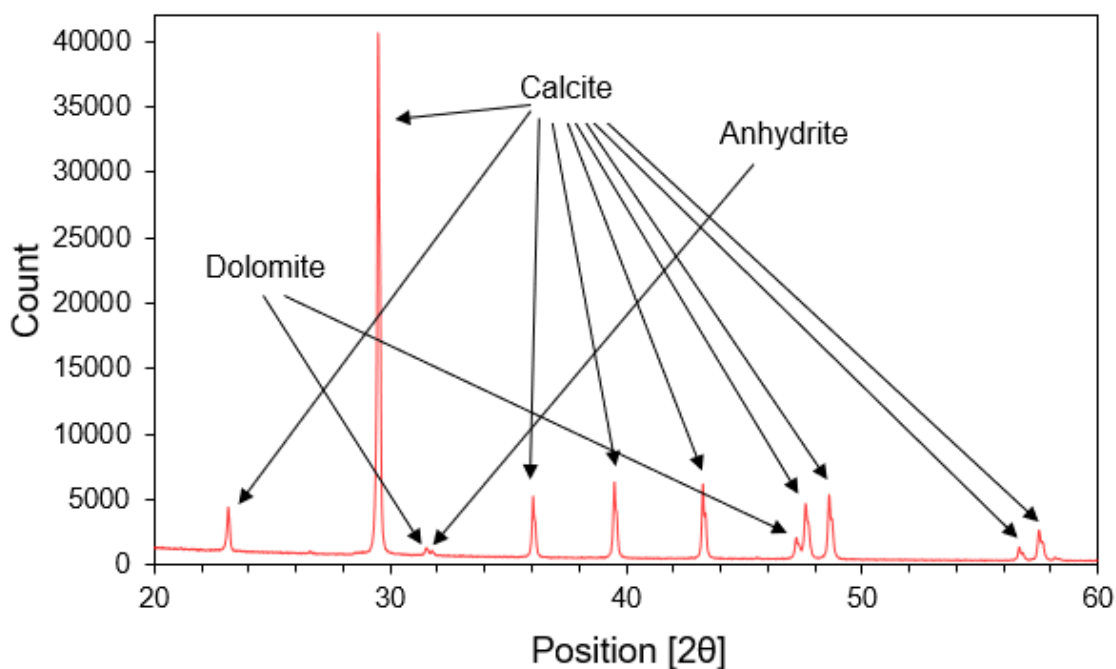

Figure S1. XRD analysis of Estailades carbonate rock.
